# Supplementary material
Source: PubMed Central journal article supplement (PMC3329935)

**Supplementary Figure 1. cgChIPs show cell type specific binding of Mad and Tcf.**

Shown are  $^{32}\text{P}$  PCRs of *LT/304* sequences pulled-down using the antibodies indicated (IgG, anti-LacI, anti-Mad, anti-Tcf) in cgChIPs of *lacO:LT/304* embryos expressing *thorax>lacI* (top) and *abdomen>lacI* (bottom). Although anti-LacI pulls down these sequences from both tissues, anti-Mad and anti-Tcf pull down these sequences only from *Dll*-expressing thoracic cells.

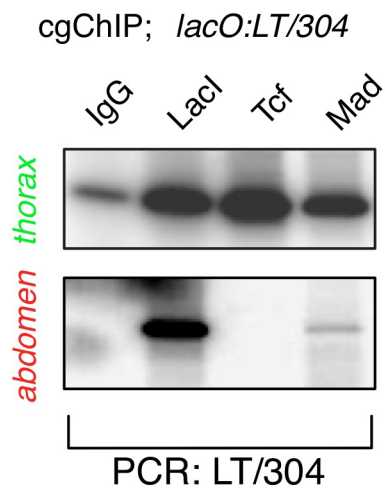

Supplement: NIHMS365392-supplement-01.pdf [file NIHMS365392-supplement-01.pdf]
